# Supplementary material for: The feedback between selection and demography shapes genomic diversity during coevolution
Source: PubMed Central journal article supplement (PMC6774728; doi:10.1126/sciadv.aax0530), 2019-10-02
Supplement: aax0530_SM.pdf [file aax0530_SM.pdf]

## Supplementary Materials for

### **The feedback between selection and demography shapes genomic diversity during coevolution**

Cas Retel, Vienna Kowallik, Weini Huang, Benjamin Werner, Sven Künzel, Lutz Becks, Philine G. D. Feulner\*

\*Corresponding author. Email: [philine.feulner@eawag.ch](mailto:philine.feulner@eawag.ch)

Published 2 October 2019, *Sci. Adv.* **5**, eaax0530 (2019)

DOI: 10.1126/sciadv.aax0530

#### **The PDF file includes:**

Fig. S1. Full infection matrix highlights coevolutionary phenotypic changes.

Fig. S2. Resistance is costly.

Fig. S3. Genetic diversity after selective sweeps matches expectations under neutrality.

Fig. S4. Repeatable genomic change provides evidence for the action of natural selection.

Fig. S5. Ecological change is less dynamic in the absence of species interactions.

Table S1. Sequencing and filtering statistics indicate the reliability of the genomic datasets.

Table S2. Observing mutations in multiple replicates independently is unlikely under neutrality.

Table S3. Functional annotations of SNPs at high frequency in host populations after selective sweep at day 27.

Table S4. Functional annotations of SNPs at high frequency in host populations after selective sweep at day 64.

Legends for data files S1 to S3

#### **Other Supplementary Material for this manuscript includes the following:**

(available at [advances.sciencemag.org/cgi/content/full/5/10/eaax0530/DC1](https://advances.sciencemag.org/cgi/content/full/5/10/eaax0530/DC1))

Data file S1 (.csv format). Population sizes (observed and smoothed values).

Data file S2 (.csv format). Results of phenotypic assays.

Data file S3 (.csv format). Filtered derived allele frequencies.

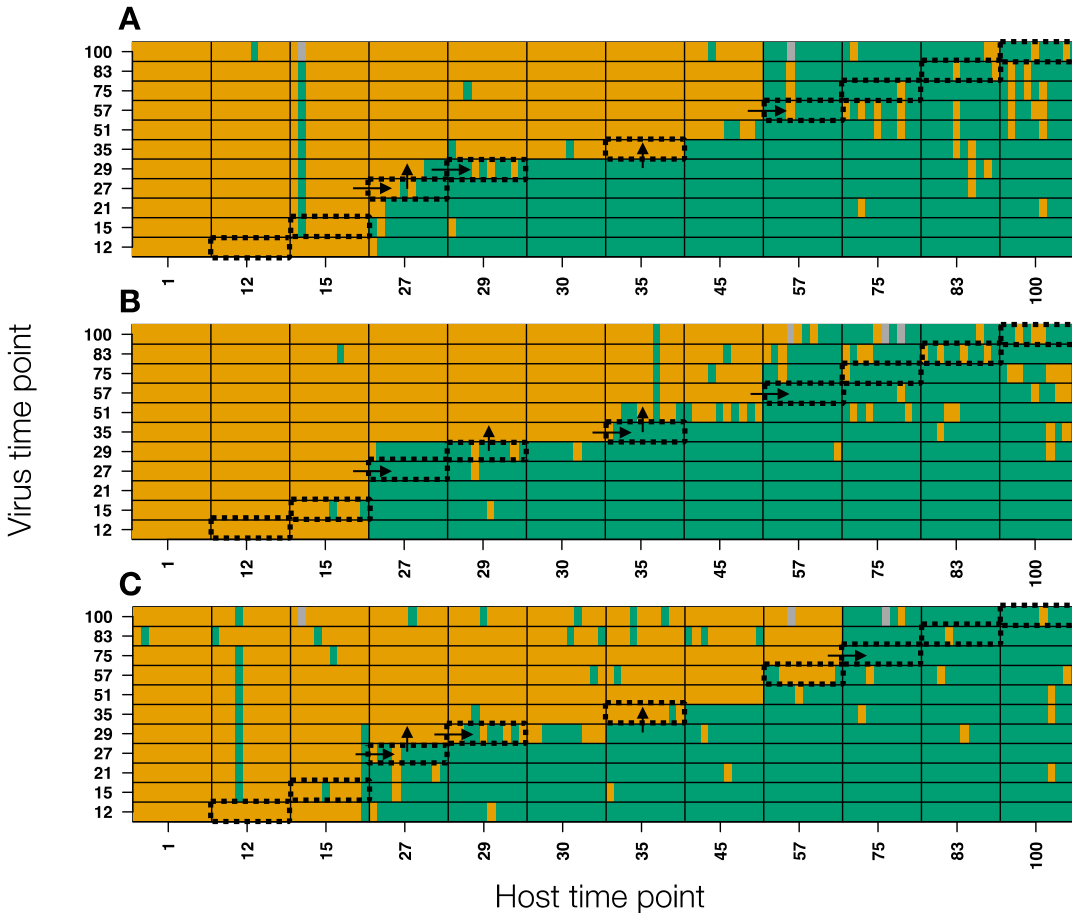

**Fig. S1. Full infection matrix highlights coevolutionary phenotypic changes.** For each pairwise combination of time points (black outlined rectangles) ten host clones (horizontal axis) and one virus population (vertical axis) were tested in comparative growth assays. Green squares (inside each of the boxed rectangles) indicate that the host clone was resistant, orange squares indicate host was susceptible to infection by the virus. Grey squares indicate missing data. Contemporary comparisons are highlighted by thicker dotted boxes. Horizontal arrows indicate that algae evolved from being susceptible at the time point before to being resistant (a change from match to mismatch). Vertical arrows indicate virus evolution; from not able to infect host from past time points to be able to infect host (a change from mismatch to match). Figures **A**, **B** and **C** correspond to replicates I, II and III, respectively.

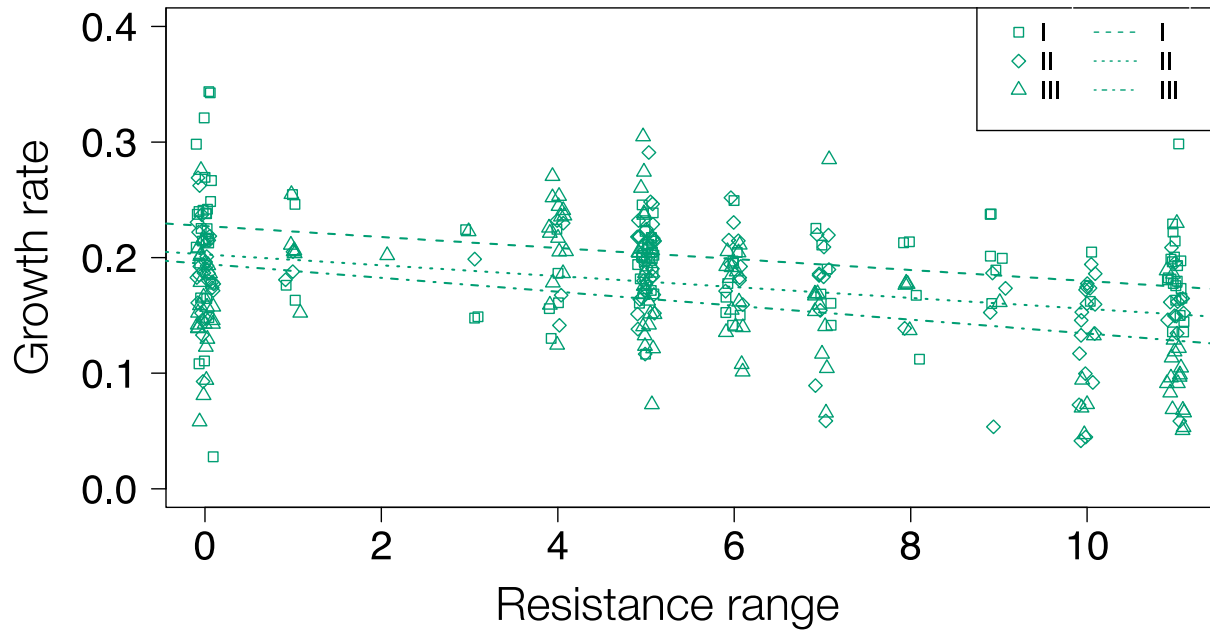

**Fig. S2. Resistance is costly.** For each host population, host growth rate in absence of virus is plotted against resistance range (0 corresponding to susceptibility to virus from every time point, 11 indicating resistance against every virus). Linear regressions of growth rate on resistance range yields negative slope estimates of  $5.2 \cdot 10^{-3} \pm 7.4 \cdot 10^{-4}$  (p-values always smaller than 0.01) for the three respective replicates; fits are shown as dotted lines. The negative correlation indicates the presence of a tradeoff between resistance range and growth in absence of the virus, which allows maintenance of multiple resistance types in the host population after the generalist evolves (28). The legend shows symbols and line types used for the three replicate experiments.

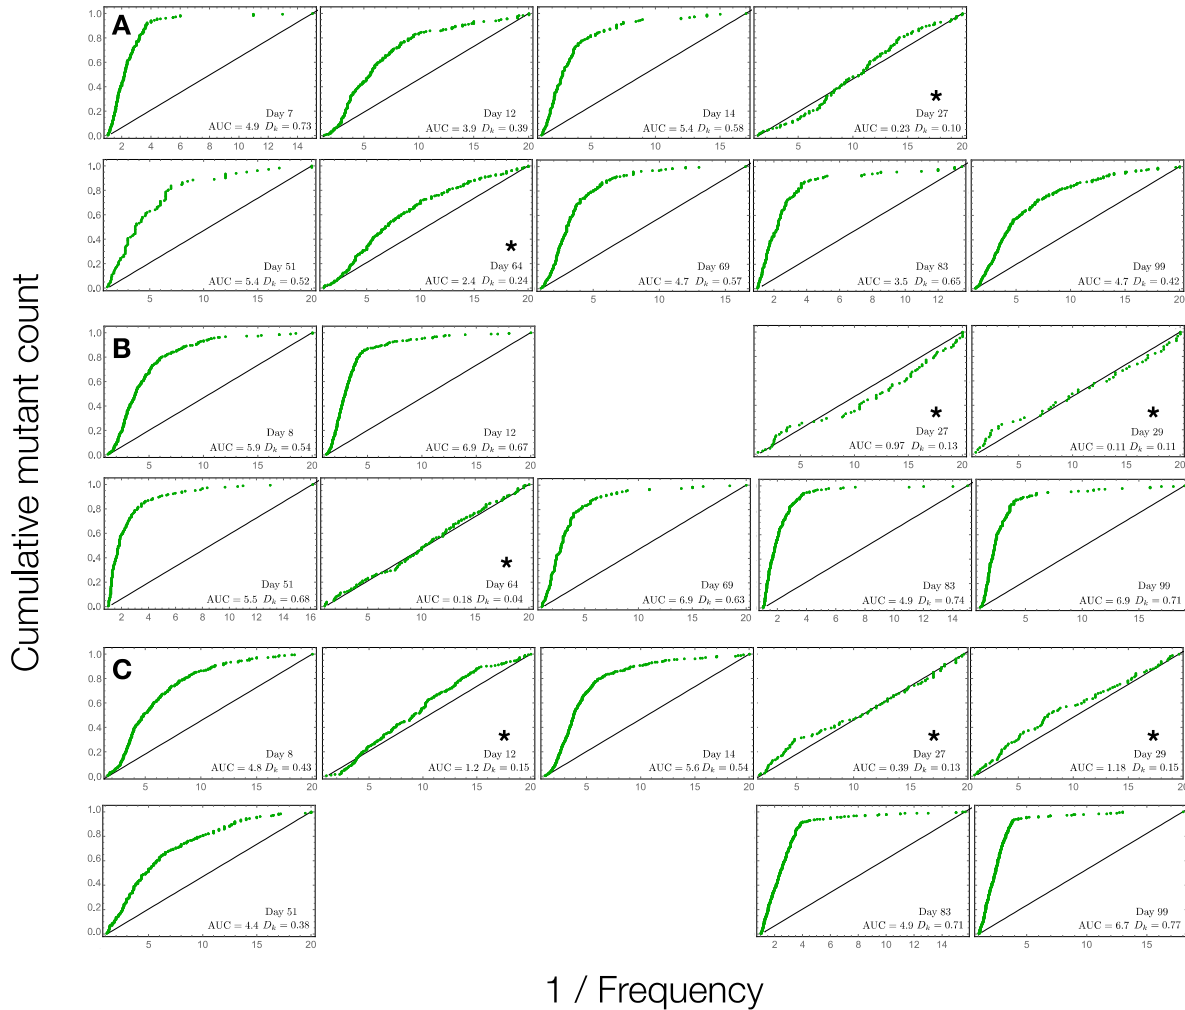

**Fig. S3. Genetic diversity after selective sweeps matches expectations under neutrality.**

Derived allele frequencies were ordered by decreasing frequency, and normalised cumulative mutant counts are plotted as green dots against the inverse of the derived frequency. Stars denote the time points matching the Luria-Delbrück expectation under neutral population expansion (see Methods for more details). Figures (A), (B), and (C) correspond to replicates I, II and III, respectively. Except for the addition of day 12 in replicate III, these time points are the same as those where selective sweeps were identified based on a reduction of genetic diversity (Fig. 3B).

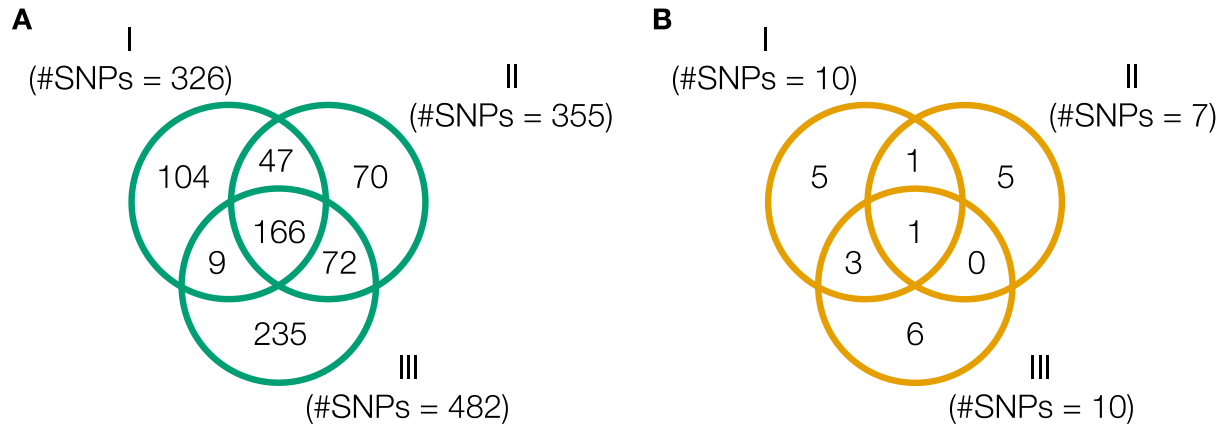

**Fig. S4. Repeatable genomic change provides evidence for the action of natural selection.**

Venn diagrams displaying the number of mutations (SNPs) and the amount of repeatability in host (A) and virus (B) populations. A mutation was classified as repeated only when the same base change occurred at the same reference position.

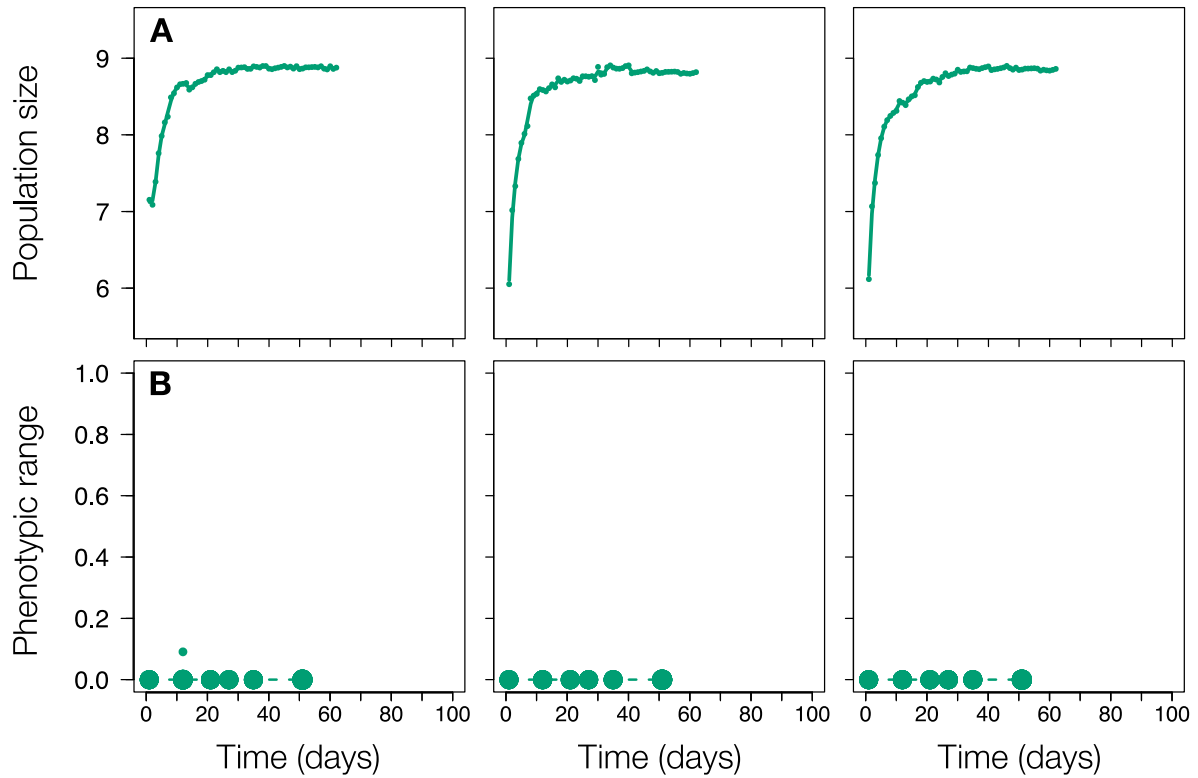

**Fig. S5. Ecological change is less dynamic in the absence of species interactions.** (A) Sizes of host populations grown in absence of the virus (dots, log10-scale), smoothed using cubic splines (lines), show exponential growth to carrying capacity. (B) Resistance to ancestral virus was measured for ten host clones from six time points per replicate. The size of the dots corresponds to the number of individuals with a specific phenotype. Resistance is rarely observed (one individual at day 12 of first control replicate) and not maintained.

**Table S1. Sequencing and filtering statistics indicate the reliability of the genomic datasets.**

(A) Average depth of coverage for each time point ('A' stands for ancestral isogenic population) per reference position for host populations after quality control and read alignment. DNA was always extracted for pairs of adjacent days, and sequencing libraries were prepared for the leg (member of each pair) with the highest concentration of DNA; this is why sometimes two days are mentioned per column (e.g. 7 & 8). Because DNA was extracted directly from chemostat samples, coverage per time point is correlated to the ratio of host-to-virus particles present at the time of sampling (see Methods for details). Struck through entries were removed from analysis because of low coverage. Across replicates and time points, virus coverage ranged from 1152X to 60411X (replicate I day 83 and replicate 3 day 21, respectively), and datasets were down-sampled to 1000X for every time point (see Methods for details). (BC) Number of polymorphic loci left after each filtering step for host (B) and virus (C) datasets. Filtering steps: 1 = changes derived frequency by less than 5% (virus) or 25% (host) in the course of the experiments, 2 = within 10 bp of an indel call, 3 = above 1% derived frequency at first observation, 4 = above detection threshold at only one time point, 5 = has more than 1 (virus) or 3 (host) missing values, 6 = merged frequency trajectory of SNPs with highly correlated frequency trajectories within 1000 bp. Rows indicate the three replicates I, II, and III.

**A**

| <i>Day</i> | <i>A</i> | <i>7</i> | <i>12</i> | <i>14</i> | <i>21</i> | <i>27</i> | <i>29</i> | <i>35</i> | <i>51</i> | <i>64</i> | <i>69</i> | <i>83</i> | <i>99</i> |
|------------|----------|----------|-----------|-----------|-----------|-----------|-----------|-----------|-----------|-----------|-----------|-----------|-----------|
|            |          | <i>8</i> |           | <i>15</i> |           |           |           | <i>41</i> |           |           | <i>70</i> |           |           |
| <i>I</i>   | 39       | 13       | 33        | 13        | 4         | 61        | 4         | 0         | 11        | 39        | 15        | 11        | 40        |
| <i>II</i>  |          | 33       | 45        | 4         | 4         | 125       | 139       | 4         | 8         | 83        | 10        | 13        | 13        |
| <i>III</i> |          | 88       | 168       | 52        | 3         | 122       | 154       | 4         | 28        | 0         | 0         | 40        | 56        |

**B**

| <i>Filtering step</i> | <i>1</i> | <i>2</i> | <i>3</i> | <i>4</i> | <i>5</i> | <i>6</i> |
|-----------------------|----------|----------|----------|----------|----------|----------|
| <i>I</i>              | 10804    | 9232     | 2326     | 418      | 384      | 326      |
| <i>II</i>             | 9623     | 8403     | 2177     | 470      | 454      | 355      |
| <i>III</i>            | 13038    | 11126    | 2262     | 646      | 636      | 482      |

**C**

| <i>Filtering step</i> | <i>1</i> | <i>2</i> | <i>3</i> | <i>4</i> | <i>5</i> | <i>6</i> |
|-----------------------|----------|----------|----------|----------|----------|----------|
| <i>I</i>              | 275      | 163      | 34       | 12       | 10       | 10       |
| <i>II</i>             | 167      | 133      | 39       | 11       | 7        | 7        |
| <i>III</i>            | 431      | 308      | 81       | 16       | 10       | 10       |



**Table S2. Observing mutations in multiple replicates independently is unlikely under neutrality.** Values reflect the number of mutations that were observed multiple times, when randomly inducing the empirical number of mutations in our experiments under stringent assumptions of neutrality, for a grid of sample sizes. Results most closely matching empirically observed overlap (fig. S4) for host (A) and virus (B) are highlighted in bold. The pool of potentially mutable sites needs to be substantially smaller than the *Chlorella variabilis* NC64A and Chlorovirus PBCV-1 reference genomes, which are respectively 42 MB and 56 kB in size and of which our approach allows us to evaluate more than 90% per replicate.

**A**

| n_total     | X_obs ± sd        |
|-------------|-------------------|
| 1000        | 473 ± 7,8         |
| 1200        | 425 ± 8,7         |
| 1400        | 383 ± 9,3         |
| 1600        | 348 ± 9,6         |
| 1800        | 318 ± 9,8         |
| <b>2000</b> | <b>292 ± 10,1</b> |
| 2200        | 270 ± 10,2        |
| 2400        | 251 ± 10,3        |
| 2600        | 235 ± 10,2        |
| 2800        | 220 ± 10,3        |
| 3000        | 207 ± 10,2        |
| 5000        | 130 ± 9,4         |
| 10 000      | 67 ± 7,4          |

**B**

| n_total   | X_obs ± sd       |
|-----------|------------------|
| 20        | 10 ± 1,1         |
| <b>50</b> | <b>5,2 ± 1,5</b> |
| 100       | 2,8 ± 1,4        |
| 200       | 1,4 ± 1,1        |
| 500       | 0,60 ± 0,74      |
| 1000      | 0,30 ± 0,54      |

**Table S3. Functional annotations of SNPs at high frequency in host populations after selective sweep at day 27.** Available information on protein structure and function (GO, KOG and KEGG databases) was extracted for all repeatable mutations above 40% frequency at this time point. The “reps found” column represents in how many experimental replicates the mutation was observed, we assigned “repeatable day 27” TRUE when its frequency is repeatedly above 40% at day 27. Two out of five unique SNPs are non-synonymous. Protein 143606 has predicted histone acetyltransferase activity, which potentially affects expression profiles of a wide range of other genes. Like the mutation observed in this gene, most of the other SNPs are not only repeatable, but consistently above 40% frequency at day 27; annotation information however is limited.

| replicate | chromosome | position | reps found | repeatable day 27 | predicted effect | proteinID | Predicted protein                  | Cellular function (kogClass) |
|-----------|------------|----------|------------|-------------------|------------------|-----------|------------------------------------|------------------------------|
| I         | 6          | 624455   | 3          | TRUE              | non-synonymous   | 143606    | Histone acetyltransferase activity | Transcription                |
| I         | 25         | 504343   | 3          | TRUE              | intergenic       | NA        | NA                                 | NA                           |
| II        | 19         | 680125   | 2          | TRUE              | synonymous       | 36653     | NA                                 | NA                           |
| II        | 25         | 504343   | 3          | TRUE              | intergenic       | NA        | NA                                 | NA                           |
| II        | 28         | 201721   | 2          | TRUE              | intergenic       | 140025    | Ubiquitin-protein ligase           | NA                           |
| III       | 6          | 624455   | 3          | TRUE              | non-synonymous   | 143606    | Histone acetyltransferase activity | Transcription                |
| III       | 19         | 680125   | 2          | TRUE              | synonymous       | 36653     | NA                                 | NA                           |
| III       | 25         | 504343   | 3          | TRUE              | intergenic       | NA        | NA                                 | NA                           |
| III       | 28         | 201721   | 2          | TRUE              | intergenic       | 140025    | Ubiquitin-protein ligase           | NA                           |
| III       | 140        | 1285     | 2          | FALSE             | non-synonymous   | NA        | NA                                 | NA                           |

**Table S4. Functional annotations of SNPs at high frequency in host populations after selective sweep at day 64.** Available information on protein structure and function (GO, KOG and KEGG databases) was extracted for all repeatable mutations above 40% frequency at this time point. The “reps found” column represents in how many experimental replicates the mutation was observed, we assigned “repeatable day 64” TRUE when its frequency is repeatably above 40% at day 64. Nine out of fifteen unique SNPs are non-synonymous. Eight are in genes encoding proteins involved in metabolism, transporting lipids, amino acids or nucleotides, and two others have a putative role in regulation of gene expression (chromatin structure and histone acetyltransferase). Though all of these potentially alter cell wall composition, no obvious candidate stands out.

| replicate | chromo-<br>some | position | reps found | repeatable<br>day 64 | predicted effect | proteinID | Predicted protein                                      | Cellular function (kogClass)        |
|-----------|-----------------|----------|------------|----------------------|------------------|-----------|--------------------------------------------------------|-------------------------------------|
| I         | 2               | 770986   | 3          | FALSE                | non-synonymous   | 49863     | NA                                                     | Chromatin structure and dynamics    |
| I         | 3               | 1038582  | 3          | FALSE                | non-synonymous   | 140596    | NA                                                     | NA                                  |
| I         | 6               | 247546   | 3          | TRUE                 | non-synonymous   | 143495    | NA                                                     | NA                                  |
| I         | 6               | 247548   | 2          | FALSE                | synonymous       | 143495    | NA                                                     | NA                                  |
| I         | 6               | 624455   | 3          | TRUE                 | non-synonymous   | 143606    | Histone acetyltransferase                              | Transcription                       |
| I         | 10              | 1373395  | 3          | FALSE                | non-synonymous   | 23149     | Dephospho-CoA kinase                                   | Coenzyme transport and metabolism   |
| I         | 16              | 1053076  | 3          | FALSE                | non-synonymous   | 58484     | Predicted lipase/calmodulin-binding heat-shock protein | Lipid transport and metabolism      |
| I         | 19              | 683581   | 3          | FALSE                | synonymous       | 36653     | NA                                                     | NA                                  |
| I         | 32              | 280834   | 3          | TRUE                 | non-synonymous   | 56405     | Acyl-CoA synthetase                                    | Lipid transport and metabolism      |
| II        | 6               | 247546   | 3          | TRUE                 | non-synonymous   | 143495    | NA                                                     | NA                                  |
| II        | 6               | 624455   | 3          | TRUE                 | non-synonymous   | 143606    | Histone acetyltransferase                              | Transcription                       |
| II        | 8               | 814819   | 2          | FALSE                | synonymous       | 144896    | Acyl-CoA synthetase                                    | Lipid transport and metabolism      |
| II        | 10              | 4355     | 2          | FALSE                | synonymous       | 52216     | Argininosuccinate synthase                             | Amino acid transport and metabolism |
| II        | 12              | 741075   | 2          | FALSE                | synonymous       | 24126     | NA                                                     | Protein amino acid phosphorylation  |
| II        | 20              | 806812   | 2          | FALSE                | non-synonymous   | 138471    | NA                                                     | Lipid transport and metabolism      |
| II        | 26              | 477054   | 3          | FALSE                | synonymous       | 32953     | Ribonucleotide reductase                               | Nucleotide transport and metabolism |
| II        | 32              | 280834   | 3          | TRUE                 | non-synonymous   | 56405     | Acyl-CoA synthetase                                    | Lipid transport and metabolism      |
| II        | 140             | 1285     | 2          | FALSE                | non-synonymous   | NA        | NA                                                     | NA                                  |

**Data file S1. Population sizes (observed and smoothed values).** Population size counts for host and virus populations and smoothed values shown in Fig. 1A (.csv format)

**Data file S2. Results of phenotypic assays.** Growth rates for 120 host individuals in presence and absence of 11 virus populations (.csv format), used to calculate resistance and infection ranges in Fig. 1B.

**Data file S3. Filtered derived allele frequencies.** Derived allele frequency of SNPs meeting our filtering criteria, plotted in Fig. 4AB (.csv format).
